# Supplementary material for: Improving Soy Sauce Aroma Using High Hydrostatic Pressure and the Preliminary Mechanism
Source: MDPI journal article supplement (doi:10.3390/foods11152190), 2022-07-23
Supplement: s1 [file s1]

Table S1 Volatile compounds of the high hydrostatic pressure (HHP)-treated and untreated soy sauces determined by GC-MS.

| Compounds               | Concentrations (µg/L)    |                          |                         |                          |                           |                          |                           |                          |                           |                         |
|-------------------------|--------------------------|--------------------------|-------------------------|--------------------------|---------------------------|--------------------------|---------------------------|--------------------------|---------------------------|-------------------------|
|                         | Control                  | HHP200-10                | HHP200-30               | HHP200-60                | HHP400-10                 | HHP400-30                | HHP400-60                 | HHP600-10                | HHP600-30                 | HHP600-60               |
| <i>Acids</i>            |                          |                          |                         |                          |                           |                          |                           |                          |                           |                         |
| Acetic acid*            | 105±8 <sup>f</sup>       | 146±9 <sup>e</sup>       | 147±9 <sup>e</sup>      | 155±9 <sup>e</sup>       | 185±12 <sup>d</sup>       | 201±15 <sup>c,d</sup>    | 218±9 <sup>b,c</sup>      | 237±10 <sup>a,b</sup>    | 240±19 <sup>a</sup>       | 245±17 <sup>a</sup>     |
| 2-Methylpropanoic acid  | 33569±715 <sup>d</sup>   | 41376±935 <sup>c</sup>   | 42674±923 <sup>c</sup>  | 44977±774 <sup>b</sup>   | 45851±643 <sup>b</sup>    | 48771±714 <sup>a</sup>   | 47928±554 <sup>a</sup>    | 46002±849 <sup>b</sup>   | 48358±963 <sup>a</sup>    | 42774±807 <sup>c</sup>  |
| Butanoic acid           | –                        | 1254±57 <sup>a</sup>     | 1302±90 <sup>a</sup>    | –                        | 1264±63 <sup>a</sup>      | 1321±86 <sup>a</sup>     | –                         | –                        | –                         | –                       |
| 2-Methylbutanoic acid   | 33750±775 <sup>a</sup>   | 32850±579 <sup>a,b</sup> | 33525±782 <sup>a</sup>  | 33075±926 <sup>a,b</sup> | 31725±951 <sup>b,c</sup>  | 30825±646 <sup>c</sup>   | 31050±707 <sup>c</sup>    | 12915±764 <sup>d,e</sup> | 11812±777 <sup>e</sup>    | 13590±823 <sup>d</sup>  |
| 3-Methylbutanoic acid   | 8532.7 ±729 <sup>e</sup> | 18684±618 <sup>c</sup>   | 21060±525 <sup>b</sup>  | 21438±720 <sup>b</sup>   | 23652±790 <sup>a</sup>    | 23760±164 <sup>a</sup>   | 24408±847 <sup>a</sup>    | 21600±740 <sup>b</sup>   | 17388±387 <sup>d</sup>    | 19116±313 <sup>c</sup>  |
| 4-Methylpentanoic acid  | –                        | 111±12 <sup>c</sup>      | 113±13 <sup>c</sup>     | 123±10 <sup>c</sup>      | 147±9 <sup>b</sup>        | 175±8 <sup>a</sup>       | 183±14 <sup>a</sup>       | 168±10 <sup>a</sup>      | 179±14 <sup>a</sup>       | 190±11 <sup>a</sup>     |
| Hexanoic acid           | –                        | 101±3 <sup>c</sup>       | 112±9 <sup>a,b,c</sup>  | 115±7 <sup>a,b</sup>     | 115±6 <sup>a,b</sup>      | 120±8 <sup>a,b</sup>     | 124±7 <sup>a</sup>        | 113±4 <sup>a,b,c</sup>   | 110±9 <sup>b,c</sup>      | 117±8 <sup>a,b</sup>    |
| 2-Ethylhexanoic acid    | 24.4±6.3 <sup>e</sup>    | 79.0±6.6 <sup>d</sup>    | 85.4±4.5 <sup>d</sup>   | –                        | 127±5 <sup>c</sup>        | 140±3 <sup>b</sup>       | 144±7 <sup>b</sup>        | 157±4 <sup>a</sup>       | 150±9 <sup>a,b</sup>      | 159±5 <sup>a</sup>      |
| 2-Methyl-2-butenic acid | –                        | 4.71±0.89 <sup>d</sup>   | 6.35±0.99 <sup>c</sup>  | 6.92±0.71 <sup>c</sup>   | 10.5±0.8 <sup>b</sup>     | 13.5±0.9 <sup>a</sup>    | 13.2±0.7 <sup>a</sup>     | 12.8±0.7 <sup>a</sup>    | 12.6±0.9 <sup>a</sup>     | 13.4±0.6 <sup>a</sup>   |
| Nonanoic acid           | 58.6±2.3 <sup>e</sup>    | –                        | 68.4±2.5 <sup>c,d</sup> | 66.2±5.6 <sup>d,e</sup>  | 72.5±1.6 <sup>b,c,d</sup> | 78.9±3.4 <sup>a,b</sup>  | 81.2±5.8 <sup>a</sup>     | –                        | 75.7±5.7 <sup>a,b,c</sup> | 82.3±5.7 <sup>a</sup>   |
| Decanoic acid           | –                        | 147±7 <sup>d</sup>       | 152±3 <sup>c,d</sup>    | 151±3 <sup>d</sup>       | 166±10 <sup>b,c</sup>     | 178±9 <sup>a,b</sup>     | 175±7 <sup>a,b</sup>      | 170±3 <sup>a,b</sup>     | 184±10 <sup>a</sup>       | 176±11 <sup>a,b</sup>   |
| Benzoic acid            | 49863±175 <sup>g</sup>   | 53647±615 <sup>f</sup>   | 53820±264 <sup>f</sup>  | 55415±527 <sup>e</sup>   | 57150±207 <sup>d</sup>    | 60911±243 <sup>b</sup>   | 61830±265 <sup>a</sup>    | 58207±229 <sup>c</sup>   | 61521±405 <sup>a,b</sup>  | 56782±539 <sup>d</sup>  |
| Phenylacetic acid       | 10158±92 <sup>e</sup>    | 11247±82 <sup>d</sup>    | 11583±75 <sup>c</sup>   | 11585±69 <sup>c</sup>    | 11924±83 <sup>b</sup>     | 12056±150 <sup>a,b</sup> | 12172±167 <sup>a</sup>    | 12113±70 <sup>a</sup>    | 12128±102 <sup>a</sup>    | 12203±92 <sup>a</sup>   |
| <i>Alcohols</i>         |                          |                          |                         |                          |                           |                          |                           |                          |                           |                         |
| Ethanol*                | 9525±225 <sup>a,b</sup>  | 9720±321 <sup>a</sup>    | 9276±187 <sup>a,b</sup> | 8644±166 <sup>d</sup>    | 9093±249 <sup>b,c</sup>   | 8820±221 <sup>c,d</sup>  | 8482±252 <sup>d</sup>     | 7681±242 <sup>e</sup>    | 7365±329 <sup>e,f</sup>   | 7090±253 <sup>f</sup>   |
| 1-Propanol              | 20.5±0.5 <sup>a</sup>    | 19.6±0.6 <sup>a</sup>    | 18.5±0.7 <sup>b</sup>   | 18.3±0.7 <sup>b</sup>    | 18.1±0.5 <sup>b</sup>     | 16.8±0.2 <sup>c</sup>    | 15.8±0.1 <sup>d</sup>     | 15.6±0.6 <sup>d</sup>    | 14.5±0.4 <sup>e</sup>     | 12.5±0.2 <sup>f</sup>   |
| 2-Methylpropanol        | 138±12 <sup>a</sup>      | 117±14 <sup>b</sup>      | 110±13 <sup>b,c</sup>   | 103±11 <sup>b,c,d</sup>  | 95.1±9.9 <sup>c,d,e</sup> | 91.2±8.9 <sup>d,e</sup>  | 91.0±8.1 <sup>d,e</sup>   | 82.3±5.0 <sup>e</sup>    | 84.1±5.6 <sup>e</sup>     | 77.3±7.4 <sup>e</sup>   |
| 1-Butanol               | 60.6±0.7 <sup>a</sup>    | –                        | 51.5±0.6 <sup>b</sup>   | 47.2±0.8 <sup>c</sup>    | 43.4±0.4 <sup>d</sup>     | 41.8±0.4 <sup>e</sup>    | 41.3±0.4 <sup>e</sup>     | 36.2±0.4 <sup>f</sup>    | 34.3±0.7 <sup>g</sup>     | 32.1±0.9 <sup>h</sup>   |
| 2-Butanol               | –                        | 10.8±0.1 <sup>d</sup>    | 10.9±0.1 <sup>d</sup>   | 11.2±0.2 <sup>c,d</sup>  | 11.4±0.1 <sup>b,c</sup>   | 11.8±0.1 <sup>a</sup>    | 11.8±0.1 <sup>a</sup>     | 11.3±0.2 <sup>c</sup>    | 11.9±0.2 <sup>a</sup>     | 11.7±0.1 <sup>a,b</sup> |
| 2-Methyl-1-butanol      | 692±17 <sup>a</sup>      | 654±16 <sup>a,b</sup>    | 659±24 <sup>a,b</sup>   | 627±42 <sup>b</sup>      | 568±35 <sup>c</sup>       | 521±21 <sup>c,d</sup>    | 512±31 <sup>d,e</sup>     | 470±36 <sup>d,e</sup>    | 464±27 <sup>e</sup>       | 475±29 <sup>d,e</sup>   |
| 3-Methyl-1-butanol      | 1012±45 <sup>a</sup>     | 968.3±55.1 <sup>a</sup>  | 944.5±79.9 <sup>a</sup> | 1012±73 <sup>a</sup>     | 1004±83 <sup>a</sup>      | 1016±86 <sup>a</sup>     | 1016±44 <sup>a</sup>      | 996.7±46.2 <sup>a</sup>  | 1012±91 <sup>a</sup>      | 928.3±51.7 <sup>a</sup> |
| 2,3-Butanediol          | 55.7±3.1 <sup>a</sup>    | 52.1±3.1 <sup>a,b</sup>  | 51.6±2.9 <sup>a,b</sup> | 51.2±2.9 <sup>a,b</sup>  | 48.3±2.9 <sup>b,c</sup>   | 49.2±3.1 <sup>b</sup>    | 47.5±3.1 <sup>b,c,d</sup> | 43.2±2.9 <sup>c,d</sup>  | 42.4±3.1 <sup>d</sup>     | 42.0±2.9 <sup>d</sup>   |
| 2-Pentanol              | 9.82±0.41 <sup>b</sup>   | 10.8±0.1 <sup>a</sup>    | 10.8±0.2 <sup>a</sup>   | 10.7±0.2 <sup>a</sup>    | 10.7±0.1 <sup>a</sup>     | 10.6±0.1 <sup>a</sup>    | 10.7±0.3 <sup>a</sup>     | 10.6±0.1 <sup>a</sup>    | 10.6±0.2 <sup>a</sup>     | 10.6±0.3 <sup>a</sup>   |

|                            |                        |                         |                            |                            |                            |                          |                          |                            |                          |                          |
|----------------------------|------------------------|-------------------------|----------------------------|----------------------------|----------------------------|--------------------------|--------------------------|----------------------------|--------------------------|--------------------------|
| Prenol                     | 1.64±0.15 <sup>a</sup> | 1.56±0.15 <sup>a</sup>  | 1.52±0.04 <sup>a</sup>     | 1.23±0.09 <sup>b</sup>     | 1.03±0.14 <sup>c</sup>     | 0.89±0.09 <sup>c,d</sup> | 0.74±0.11 <sup>d</sup>   | 0.72±0.06 <sup>d</sup>     | 0.53±0.09 <sup>e</sup>   | 0.40±0.04 <sup>e</sup>   |
| 4-Methyl-2-pentanol        | 18.0±0.4 <sup>a</sup>  | 12.6±1.9 <sup>b,c</sup> | 13.8±2.1 <sup>b</sup>      | 11.2±0.6 <sup>c</sup>      | –                          | 6.85±0.62 <sup>d</sup>   | 6.41±0.12 <sup>d</sup>   | 4.43±0.41 <sup>e</sup>     | 3.51±0.21 <sup>f</sup>   | 3.02±0.19 <sup>g</sup>   |
| 2,3-Dimethylpentanol       | –                      | 0.35±0.18 <sup>c</sup>  | 1.27±0.16 <sup>b</sup>     | 1.28±0.20 <sup>b</sup>     | 1.32±0.13 <sup>b</sup>     | 1.36±0.16 <sup>a,b</sup> | 1.44±0.07 <sup>a,b</sup> | 1.53±0.15 <sup>a,b</sup>   | 1.62±0.16 <sup>a</sup>   | 1.65±0.13 <sup>a</sup>   |
| 1-Hexanol                  | 1.82±0.18 <sup>d</sup> | 1.93±0.15 <sup>d</sup>  | 1.67±0.17 <sup>d</sup>     | 2.35±0.19 <sup>c</sup>     | 3.21±0.22 <sup>b</sup>     | 3.69±0.11 <sup>a</sup>   | 3.72±0.16 <sup>a</sup>   | 3.54±0.17 <sup>a</sup>     | 3.79±0.26 <sup>a</sup>   | –                        |
| 4-Methyl-1-hexanol         | –                      | –                       | 1.68±0.17 <sup>d</sup>     | 1.73±0.10 <sup>c,d</sup>   | 1.96±0.09 <sup>b,c,d</sup> | 1.96±0.17 <sup>b,c</sup> | 2.01±0.14 <sup>b,c</sup> | 1.89±0.16 <sup>b,c,d</sup> | 2.03±0.16 <sup>b</sup>   | 2.31±0.15 <sup>a</sup>   |
| 2-Ethyl-1-hexanol          | 23.7±4.3 <sup>f</sup>  | 47.7±8.3 <sup>c,d</sup> | 84.7±7.4 <sup>a</sup>      | 35.4±3.9 <sup>d,e,f</sup>  | 87.1±5.5 <sup>a</sup>      | 96.6±9.2 <sup>a</sup>    | 40.2±8.1 <sup>d,e</sup>  | 71.2±7.5 <sup>b</sup>      | 55.8±7.7 <sup>c</sup>    | 30.4±7.0 <sup>e,f</sup>  |
| 2-Heptanol                 | 1.27±0.18 <sup>d</sup> | 2.96±0.34 <sup>c</sup>  | 2.33±0.47 <sup>c</sup>     | 2.41±0.47 <sup>c</sup>     | 4.63±0.49 <sup>b</sup>     | 5.10±0.16 <sup>a,b</sup> | 5.13±0.34 <sup>a,b</sup> | –                          | 5.01±0.49 <sup>a,b</sup> | 5.32±0.11 <sup>a</sup>   |
| 6-Methyl-2-heptanol        | –                      | 4.71±0.58 <sup>b</sup>  | 4.93±0.47 <sup>a,b</sup>   | 5.01±0.36 <sup>a,b</sup>   | 5.34±0.28 <sup>a,b</sup>   | 5.41±0.37 <sup>a,b</sup> | 5.46±0.47 <sup>a,b</sup> | 5.61±0.45 <sup>a</sup>     | 5.64±0.31 <sup>a</sup>   | 5.52±0.20 <sup>a</sup>   |
| 3-Octanol                  | 6.64±0.71 <sup>e</sup> | 10.1±0.8 <sup>d</sup>   | 12.9±1.0 <sup>c</sup>      | 13.7±1.2 <sup>c</sup>      | 16.2±0.7 <sup>b</sup>      | 17.5±0.9 <sup>a,b</sup>  | 17.9±0.8 <sup>a</sup>    | 16.3±0.7 <sup>b</sup>      | 16.8±0.4 <sup>a,b</sup>  | 17.9±0.4 <sup>a</sup>    |
| 1-Octen-3-ol               | 31.8±1.4 <sup>d</sup>  | 45.6±4.1 <sup>c</sup>   | 49.4±1.2 <sup>c</sup>      | 56.6±2.2 <sup>b</sup>      | 60.3±4.5 <sup>b</sup>      | 66.6±3.7 <sup>a</sup>    | 67.8±1.9 <sup>a</sup>    | 67.5±5.2 <sup>a</sup>      | 67.8±1.8 <sup>a</sup>    | 66.9±5.2 <sup>a</sup>    |
| 1-Nonanol                  | 0.98±0.08 <sup>a</sup> | 0.53±0.04 <sup>b</sup>  | 0.51±0.05 <sup>b</sup>     | 0.42±0.03 <sup>c,d</sup>   | 0.44±0.02 <sup>c</sup>     | 0.43±0.03 <sup>c</sup>   | 0.42±0.03 <sup>c,d</sup> | 0.40±0.02 <sup>c,d</sup>   | 0.37±0.02 <sup>c,d</sup> | 0.35±0.03 <sup>d</sup>   |
| 2-Nonanol                  | –                      | 1.95±0.32 <sup>c</sup>  | 2.31±0.17 <sup>c</sup>     | 2.35±0.25 <sup>c</sup>     | 2.78±0.20 <sup>b</sup>     | 3.17±0.24 <sup>a</sup>   | 3.23±0.15 <sup>a</sup>   | 3.57±0.33 <sup>a</sup>     | 3.59±0.13 <sup>a</sup>   | 3.56±0.13 <sup>a</sup>   |
| Benzylalcohol              | 7.82±0.49 <sup>g</sup> | 14.8±0.9 <sup>f</sup>   | 15.5±0.7 <sup>f</sup>      | 18.4±0.5 <sup>d,e</sup>    | 19.5±0.4 <sup>c,d</sup>    | 24.9±0.8 <sup>a</sup>    | 23.3±0.6 <sup>b</sup>    | 20.8±0.7 <sup>c</sup>      | 17.7±0.8 <sup>e</sup>    | 17.8±1.0 <sup>e</sup>    |
| Methylbenzyl alcohol       | –                      | 1.56±0.42 <sup>b</sup>  | 1.73±0.20 <sup>a,b</sup>   | 1.79±0.49 <sup>a,b</sup>   | 2.25±0.43 <sup>a,b</sup>   | 2.34±0.21 <sup>a</sup>   | 2.31±0.14 <sup>a</sup>   | 2.03±0.40 <sup>a,b</sup>   | 2.11±0.42 <sup>a,b</sup> | 1.95±0.16 <sup>a,b</sup> |
| Phenylethanol*             | 123±8 <sup>a</sup>     | 111±6 <sup>b</sup>      | 105±5 <sup>b,c</sup>       | 104±6 <sup>b,c</sup>       | 103±6 <sup>b,c</sup>       | 105±7 <sup>b,c</sup>     | 96.2±5.1 <sup>c,d</sup>  | 91.1±9.8 <sup>d</sup>      | 89.4±6.5 <sup>d</sup>    | 87.3±5.2 <sup>d</sup>    |
| α-Ethyl phenylethanol      | 220±11 <sup>a</sup>    | 203±12 <sup>a,b</sup>   | 198±9 <sup>b</sup>         | 190±8 <sup>b</sup>         | 162±11 <sup>c</sup>        | 150±11 <sup>c,d</sup>    | 143±11 <sup>d</sup>      | 121±7 <sup>e</sup>         | 115±10 <sup>e</sup>      | 119±11 <sup>e</sup>      |
| 1-(2-Butoxyethoxy)-ethanol | –                      | 6.32±0.41 <sup>d</sup>  | 6.79±0.37 <sup>b,c,d</sup> | 6.95±0.27 <sup>b,c,d</sup> | 7.51±0.29 <sup>b</sup>     | 8.48±0.46 <sup>a</sup>   | 8.33±0.45 <sup>a</sup>   | 7.23±0.31 <sup>b,c</sup>   | 7.36±0.54 <sup>b,c</sup> | 6.73±0.41 <sup>c,d</sup> |
| 4-Phenyl-3-buten-2-ol      | –                      | 15.6±2.2 <sup>c</sup>   | 18.8±2.2 <sup>c</sup>      | 19.8±2.8 <sup>c</sup>      | 25.3±2.8 <sup>b</sup>      | 30.1±2.4 <sup>a</sup>    | 30.8±1.3 <sup>a</sup>    | 33.3±2.7 <sup>a</sup>      | 30.2±2.2 <sup>a</sup>    | –                        |
| <i>Aldehydes</i>           |                        |                         |                            |                            |                            |                          |                          |                            |                          |                          |
| Acetaldehyde               | 22.6±0.7 <sup>a</sup>  | 19.5±1.2 <sup>b</sup>   | 17.7±0.8 <sup>c</sup>      | 16.9±1.3 <sup>c</sup>      | 12.1±0.8 <sup>d</sup>      | 10.9±0.6 <sup>d,e</sup>  | 11.0±0.5 <sup>d,e</sup>  | 9.44±0.59 <sup>e</sup>     | 9.01±0.47 <sup>e</sup>   | 8.17±0.58 <sup>e</sup>   |
| 2-Methylpropanal           | –                      | 100±9 <sup>b</sup>      | –                          | –                          | 93.5±8.1 <sup>b</sup>      | 96.3±7.6 <sup>b</sup>    | 131±8 <sup>a</sup>       | –                          | –                        | –                        |
| 2-Methylbutanal            | 1045±80 <sup>d</sup>   | 1188±52 <sup>b,c</sup>  | 1210±58 <sup>a,b</sup>     | 1232±65 <sup>a,b</sup>     | 1262±46 <sup>a,b</sup>     | 1296±34 <sup>a,b</sup>   | 1311±40 <sup>a</sup>     | 1095±71 <sup>c,d</sup>     | 1091±65 <sup>c,d</sup>   | 1095±73 <sup>c,d</sup>   |
| 3-Methylbutanal            | 376±23 <sup>b</sup>    | 416±35 <sup>a,b</sup>   | 429±37 <sup>a,b</sup>      | 422±34 <sup>a,b</sup>      | 433±36 <sup>a,b</sup>      | 451±39 <sup>a</sup>      | 439±28 <sup>a,b</sup>    | 392±32 <sup>a,b</sup>      | 390±30 <sup>a,b</sup>    | 381±27 <sup>b</sup>      |
| Benzaldehyde               | 140±8 <sup>a</sup>     | 52.5±3.7 <sup>b</sup>   | 36.7±2.5 <sup>c</sup>      | 30.2±2.4 <sup>c,d</sup>    | 19.4±1.8 <sup>d</sup>      | 18.3±1.1 <sup>d</sup>    | 23.5±1.2 <sup>c,d</sup>  | 15.4±1.1 <sup>d</sup>      | 16.9±1.7 <sup>d</sup>    | 13.3±0.9 <sup>d</sup>    |
| Benzeneacetaldehyde        | 420±29 <sup>d</sup>    | 463±30 <sup>c,d</sup>   | 528±33 <sup>b,c</sup>      | 545±33 <sup>b</sup>        | 690±43 <sup>a</sup>        | 712±52 <sup>a</sup>      | 651±44 <sup>a</sup>      | 527±31 <sup>b,c</sup>      | 535±46 <sup>b</sup>      | 446±37 <sup>d</sup>      |
| 3-Furaldehyde              | 11.2±0.8 <sup>d</sup>  | 16.5±1.4 <sup>c</sup>   | 19.8±0.8 <sup>b</sup>      | 12.1±1.4 <sup>d</sup>      | 20.3±1.5 <sup>b</sup>      | 22.5±1.6 <sup>a</sup>    | 22.8±0.8 <sup>a</sup>    | 23.4±0.7 <sup>a</sup>      | 23.1±1.2 <sup>a</sup>    | 18.7±1.1 <sup>b</sup>    |
| Methyl cinnamaldehyde      | –                      | 4.32±0.10 <sup>d</sup>  | 5.16±0.19 <sup>c</sup>     | 5.91±0.28 <sup>b</sup>     | 6.31±0.11 <sup>b</sup>     | 7.36±0.31 <sup>a</sup>   | 7.11±0.44 <sup>a</sup>   | 3.90±0.26 <sup>d,e</sup>   | 3.71±0.29 <sup>e</sup>   | 2.52±0.19 <sup>f</sup>   |

### Ketones

|                                            |                        |                          |                            |                           |                           |                           |                           |                          |                          |                          |
|--------------------------------------------|------------------------|--------------------------|----------------------------|---------------------------|---------------------------|---------------------------|---------------------------|--------------------------|--------------------------|--------------------------|
| Acetone                                    | –                      | 12.7±1.8 <sup>g</sup>    | 15.5±2.0 <sup>f</sup>      | 18.6±1.6 <sup>e</sup>     | 28.4±1.9 <sup>d</sup>     | 32.2±0.7 <sup>c</sup>     | 35.9±1.5 <sup>a</sup>     | 31.1±1.5 <sup>c,d</sup>  | 32.8±1.2 <sup>b,c</sup>  | 35.2±1.2 <sup>a,b</sup>  |
| 2-Butanone                                 | 1.85±0.21 <sup>g</sup> | 2.47±0.16 <sup>f</sup>   | 3.34±0.29 <sup>e</sup>     | 4.21±0.23 <sup>d</sup>    | 6.43±0.27 <sup>b,c</sup>  | 6.78±0.15 <sup>a,b</sup>  | 6.10±0.22 <sup>c</sup>    | 6.36±0.24 <sup>b,c</sup> | 7.09±0.26 <sup>a</sup>   | 3.13±0.31 <sup>e</sup>   |
| Acetoin                                    | 9.83±0.46 <sup>a</sup> | 7.55±0.44 <sup>b</sup>   | 7.38±0.47 <sup>b</sup>     | 6.93±0.34 <sup>b</sup>    | 5.82±0.46 <sup>c</sup>    | 5.45±0.16 <sup>c,d</sup>  | 4.94±0.25 <sup>d,e</sup>  | 4.30±0.51 <sup>e,f</sup> | 4.02±0.52 <sup>f</sup>   | 3.98±0.45 <sup>f</sup>   |
| Methyl isobutyl ketone                     | –                      | 0.83±0.09 <sup>e</sup>   | 0.87±0.12 <sup>e</sup>     | 0.92±0.14 <sup>e</sup>    | 1.25±0.06 <sup>d</sup>    | 1.72±0.10 <sup>c</sup>    | 1.87±0.09 <sup>b,c</sup>  | 2.11±0.11 <sup>a</sup>   | 2.01±0.13 <sup>a,b</sup> | 2.12±0.12 <sup>a</sup>   |
| 2,3-Pentanedione                           | 0.59±0.01 <sup>a</sup> | 0.55±0.01 <sup>b</sup>   | 0.52±0.01 <sup>c</sup>     | 0.51±0.01 <sup>c</sup>    | 0.46±0.01 <sup>e</sup>    | 0.48±0.01 <sup>d</sup>    | 0.48±0.01 <sup>d</sup>    | 0.37±0.01 <sup>f</sup>   | 0.38±0.02 <sup>f</sup>   | 0.37±0.01 <sup>f</sup>   |
| 3-Penten-2-one                             | –                      | 0.11±0.01 <sup>e</sup>   | 0.13±0.01 <sup>e</sup>     | 0.12±0.01 <sup>e</sup>    | 0.18±0.01 <sup>d</sup>    | 0.22±0.01 <sup>c</sup>    | 0.25±0.01 <sup>b,c</sup>  | 0.29±0.01 <sup>a</sup>   | 0.27±0.01 <sup>a,b</sup> | 0.28±0.01 <sup>a</sup>   |
| 5-Methyl-2-hexanone                        | 1.21±0.19 <sup>e</sup> | 1.56±0.30 <sup>e</sup>   | 2.05±0.16 <sup>d</sup>     | 2.64±0.03 <sup>c</sup>    | 4.11±0.17 <sup>b</sup>    | 4.67±0.32 <sup>a</sup>    | 4.52±0.26 <sup>a</sup>    | 4.66±0.21 <sup>a</sup>   | 4.62±0.24 <sup>a</sup>   | 4.77±0.19 <sup>a</sup>   |
| 6-Methyl-2-heptanone                       | –                      | 1.57±0.11 <sup>b</sup>   | 1.68±0.09 <sup>b</sup>     | 1.71±0.10 <sup>b</sup>    | 2.05±0.10 <sup>a</sup>    | 2.13±0.11 <sup>a</sup>    | 2.16±0.11 <sup>a</sup>    | 2.17±0.09 <sup>a</sup>   | 2.13±0.11 <sup>a</sup>   | 2.17±0.10 <sup>a</sup>   |
| 3-Octanone                                 | 6.50±0.50 <sup>e</sup> | 6.93±0.55 <sup>d,e</sup> | 7.84±0.52 <sup>c,d</sup>   | 8.15±0.65 <sup>c</sup>    | 9.80±0.74 <sup>b</sup>    | 14.5±1.1 <sup>a</sup>     | 14.0±0.9 <sup>a</sup>     | 3.50±0.24 <sup>f</sup>   | 8.20±0.51 <sup>c</sup>   | –                        |
| Isophorone                                 | –                      | 1.02±0.09 <sup>f</sup>   | 1.13±0.04 <sup>f</sup>     | 1.10±0.06 <sup>f</sup>    | 2.16±0.10 <sup>b</sup>    | 2.36±0.14 <sup>a</sup>    | 1.89±0.08 <sup>c</sup>    | 1.79±0.04 <sup>c,d</sup> | 1.76±0.07 <sup>d</sup>   | 1.63±0.04 <sup>e</sup>   |
| 1-Phenyl-1-propanone                       | 16.9±0.5 <sup>a</sup>  | 13.2±1.3 <sup>b</sup>    | 12.7±0.6 <sup>b,c</sup>    | 12.2±0.8 <sup>b,c,d</sup> | 12.4±1.3 <sup>b,c,d</sup> | 12.1±1.1 <sup>b,c,d</sup> | 11.2±1.3 <sup>c,d,e</sup> | 10.7±0.8 <sup>d,e</sup>  | 10.2±1.0 <sup>e</sup>    | 9.45±0.51 <sup>e</sup>   |
| 2,6,6-Trimethyl-2,4-cyclohexanediene-1-one | –                      | 1.57±0.16 <sup>c</sup>   | 1.59±0.13 <sup>c</sup>     | 1.63±0.13 <sup>c</sup>    | 1.96±0.12 <sup>b</sup>    | 2.18±0.12 <sup>a,b</sup>  | 2.34±0.17 <sup>a</sup>    | 2.35±0.15 <sup>a</sup>   | 2.31±0.14 <sup>a</sup>   | 2.36±0.16 <sup>a</sup>   |
| 3-Hydroxy-3-phenylbutan-2-one              | 2.84±0.18 <sup>g</sup> | 3.37±0.14 <sup>g</sup>   | 4.79±0.29 <sup>f</sup>     | 5.51±0.24 <sup>f</sup>    | 8.01±0.27 <sup>e</sup>    | 8.31±0.38 <sup>e</sup>    | 9.17±0.58 <sup>d</sup>    | 10.1±0.9 <sup>c</sup>    | 11.8±0.5 <sup>b</sup>    | 12.9±0.7 <sup>a</sup>    |
| (E)-β-damascenone                          | –                      | 0.086±0.004 <sup>e</sup> | 0.095±0.005 <sup>d,e</sup> | 0.097±0.005 <sup>d</sup>  | 0.119±0.007 <sup>c</sup>  | 0.176±0.009 <sup>a</sup>  | 0.159±0.008 <sup>b</sup>  | 0.065±0.003 <sup>f</sup> | 0.074±0.004 <sup>f</sup> | 0.070±0.003 <sup>f</sup> |

### Esters

|                        |                        |                         |                          |                         |                        |                         |                          |                          |                          |                        |
|------------------------|------------------------|-------------------------|--------------------------|-------------------------|------------------------|-------------------------|--------------------------|--------------------------|--------------------------|------------------------|
| Ethyl acetate*         | 525±24 <sup>a</sup>    | 506±20 <sup>a,b</sup>   | 500±24 <sup>a,b</sup>    | 486±25 <sup>a,b,c</sup> | 464±30 <sup>b,c</sup>  | 445±28 <sup>c,d</sup>   | 443±28 <sup>c,d</sup>    | 414±19 <sup>d,e</sup>    | 401±28 <sup>d,e</sup>    | 388±22 <sup>e</sup>    |
| Ethyl propanoate       | 164±9 <sup>a</sup>     | 158±8 <sup>a</sup>      | 142±8 <sup>b</sup>       | 132±7 <sup>b,c</sup>    | 125±6 <sup>c</sup>     | 136±8 <sup>b,c</sup>    | 106±7 <sup>d</sup>       | 86.0±6.3 <sup>e</sup>    | 85.6±5.2 <sup>e</sup>    | 72.6±4.3 <sup>f</sup>  |
| Ethyl lactate          | 52.1±2.2 <sup>a</sup>  | 50.4±1.5 <sup>a,b</sup> | 47.7±2.2 <sup>b</sup>    | 42.3±2.1 <sup>c</sup>   | 38.8±1.4 <sup>d</sup>  | 31.2±2.1 <sup>e,f</sup> | 32.1±1.5 <sup>e</sup>    | 27.7±2.6 <sup>f,g</sup>  | 26.5±2.5 <sup>g,h</sup>  | 23.3±1.6 <sup>h</sup>  |
| Ethyl butanoate        | 5.04±0.36 <sup>a</sup> | 3.32±0.14 <sup>b</sup>  | 3.02±0.27 <sup>b,c</sup> | 2.99±0.10 <sup>c</sup>  | 1.76±0.18 <sup>d</sup> | 1.34±0.19 <sup>e</sup>  | 1.57±0.08 <sup>d,e</sup> | 1.02±0.11 <sup>f</sup>   | 0.98±0.04 <sup>f</sup>   | 0.96±0.13 <sup>f</sup> |
| Ethyl isobutyrate      | 3.74±0.26 <sup>a</sup> | 2.91±0.13 <sup>b</sup>  | 2.74±0.09 <sup>b</sup>   | 2.37±0.05 <sup>c</sup>  | 1.92±0.16 <sup>d</sup> | 1.53±0.18 <sup>e</sup>  | 1.51±0.09 <sup>e</sup>   | 0.77±0.12 <sup>f</sup>   | 0.93±0.05 <sup>f</sup>   | 0.82±0.04 <sup>f</sup> |
| Ethyl 2-methylbutyrate | 23.1±1.1 <sup>a</sup>  | 20.4±1.0 <sup>b</sup>   | 16.5±0.9 <sup>c</sup>    | 16.4±0.9 <sup>c</sup>   | 10.8±0.7 <sup>d</sup>  | 7.35±0.41 <sup>e</sup>  | 7.16±0.34 <sup>e</sup>   | 6.51±0.23 <sup>e</sup>   | 6.26±0.35 <sup>e</sup>   | 5.32±0.27 <sup>f</sup> |
| Ethyl isovalerate      | 325±18 <sup>a</sup>    | 315±18 <sup>a,b</sup>   | 316±19 <sup>a</sup>      | 309±19 <sup>a,b,c</sup> | 277±19 <sup>c,d</sup>  | 282±16 <sup>b,c,d</sup> | 262±18 <sup>d,e</sup>    | 238±19 <sup>e,f</sup>    | 220±17 <sup>f</sup>      | 217±17 <sup>f</sup>    |
| Ethyl hexanoate        | 8.55±0.31 <sup>a</sup> | 5.49±0.26 <sup>c</sup>  | 5.62±0.22 <sup>b,c</sup> | 4.77±0.24 <sup>d</sup>  | 4.91±0.18 <sup>d</sup> | 5.87±0.22 <sup>b</sup>  | 2.23±0.13 <sup>e</sup>   | 1.72±0.11 <sup>f</sup>   | 1.45±0.10 <sup>f</sup>   | 1.03±0.05 <sup>g</sup> |
| Ethyl isohexanoate     | 4.88±0.29 <sup>a</sup> | 3.52±0.21 <sup>b</sup>  | 3.37±0.18 <sup>b,c</sup> | –                       | 3.15±0.11 <sup>c</sup> | 2.76±0.19 <sup>d</sup>  | 2.58±0.18 <sup>d,e</sup> | 2.46±0.17 <sup>d,e</sup> | 2.43±0.15 <sup>d,e</sup> | 2.41±0.19 <sup>e</sup> |

|                                        |                        |                          |                          |                          |                          |                          |                          |                          |                         |                          |
|----------------------------------------|------------------------|--------------------------|--------------------------|--------------------------|--------------------------|--------------------------|--------------------------|--------------------------|-------------------------|--------------------------|
| Ethyl 5-methylhexanoate                | 1.93±0.06 <sup>a</sup> | 1.82±0.05 <sup>a,b</sup> | 1.78±0.09 <sup>b,c</sup> | 1.79±0.07 <sup>b,c</sup> | 1.68±0.06 <sup>c,d</sup> | –                        | 1.62±0.05 <sup>d</sup>   | 1.45±0.09 <sup>e</sup>   | 1.40±0.06 <sup>e</sup>  | 1.42±0.06 <sup>e</sup>   |
| Ethyl 2-ethylhexanoate                 | 3.50±0.31 <sup>c</sup> | 3.32±0.32 <sup>c</sup>   | 3.54±0.17 <sup>b,c</sup> | 3.63±0.16 <sup>b,c</sup> | 4.21±0.31 <sup>a</sup>   | 4.30±0.35 <sup>a</sup>   | 4.26±0.18 <sup>a</sup>   | 4.03±0.36 <sup>a,b</sup> | 4.16±0.21 <sup>a</sup>  | 4.02±0.26 <sup>a,b</sup> |
| Ethyl heptanoate                       | 3.91±0.05 <sup>a</sup> | 1.97±0.09 <sup>b</sup>   | 1.54±0.07 <sup>c</sup>   | –                        | 1.68±0.08 <sup>c</sup>   | –                        | –                        | –                        | –                       | –                        |
| Ethyl caprylate                        | 7.05±0.43 <sup>a</sup> | 6.57±0.17 <sup>a,b</sup> | 6.59±0.17 <sup>a,b</sup> | 6.43±0.19 <sup>b</sup>   | –                        | –                        | –                        | 5.21±0.34 <sup>c</sup>   | –                       | –                        |
| Ethyl nonanoate                        | 2.33±0.15 <sup>a</sup> | 2.03±0.15 <sup>b</sup>   | –                        | –                        | 1.93±0.13 <sup>b</sup>   | 2.07±0.12 <sup>b</sup>   | –                        | –                        | –                       | –                        |
| Ethyl palmitate                        | 13.7±0.8 <sup>a</sup>  | 11.3±0.7 <sup>b</sup>    | 10.1±0.6 <sup>c</sup>    | 9.21±0.45 <sup>d</sup>   | 6.40±0.44 <sup>f</sup>   | 4.07±0.21 <sup>i</sup>   | 4.90±0.34 <sup>h,i</sup> | 7.31±0.36 <sup>e</sup>   | 5.82±0.21 <sup>g</sup>  | 5.25±0.56 <sup>g,h</sup> |
| Ethyl 9-hexadecenoate                  | 12.3±0.6 <sup>a</sup>  | 5.58±0.31 <sup>b</sup>   | 4.46±0.25 <sup>c</sup>   | 3.15±0.25 <sup>d</sup>   | 2.70±0.15 <sup>e</sup>   | 1.08±0.06 <sup>f</sup>   | 1.21±0.06 <sup>f</sup>   | 0.94±0.07 <sup>f</sup>   | 0.82±0.05 <sup>f</sup>  | 0.91±0.04 <sup>f</sup>   |
| Ethyl oleate                           | 2.02±0.11 <sup>a</sup> | 1.64±0.14 <sup>b</sup>   | 1.51±0.06 <sup>b</sup>   | –                        | –                        | –                        | –                        | –                        | 1.03±0.08 <sup>c</sup>  | –                        |
| (E)-9-Octadecenoic acid<br>ethyl ester | 5.31±0.28 <sup>a</sup> | 3.25±0.19 <sup>b</sup>   | –                        | –                        | 2.16±0.15 <sup>c</sup>   | –                        | –                        | 2.05±0.13 <sup>c</sup>   | –                       | –                        |
| Ethyl tiglate                          | 1.53±0.07 <sup>a</sup> | 1.22±0.08 <sup>b</sup>   | 0.51±0.07 <sup>c</sup>   | –                        | –                        | –                        | –                        | –                        | –                       | –                        |
| Ethyl benzoate                         | 210±14 <sup>a</sup>    | 175±11 <sup>b</sup>      | 134±12 <sup>c</sup>      | 130±10 <sup>c</sup>      | 101±7 <sup>d</sup>       | 80.6±5.6 <sup>e</sup>    | 84.2±5.3 <sup>e</sup>    | 89.5±6.2 <sup>d,e</sup>  | 91.3±6.1 <sup>d,e</sup> | 83.7±4.8 <sup>e</sup>    |
| Ethyl phenylacetate                    | 78.6±4.6 <sup>a</sup>  | 40.3±3.1 <sup>b</sup>    | 39.8±2.5 <sup>b</sup>    | 34.7±2.3 <sup>c</sup>    | 31.4±1.9 <sup>c,d</sup>  | 30.8±1.6 <sup>c,d</sup>  | 24.3±1.8 <sup>e</sup>    | 28.6±1.5 <sup>d</sup>    | 20.4±1.6 <sup>e,f</sup> | 18.5±1.1 <sup>f</sup>    |
| 2-Phenylethyl acetate                  | 503±34 <sup>a</sup>    | 430±23 <sup>b</sup>      | –                        | –                        | 353±22 <sup>c</sup>      | 350±29 <sup>c</sup>      | 338±27 <sup>c</sup>      | 230±20 <sup>d</sup>      | –                       | –                        |
| Ethyl 3-phenylpropionate               | 4.73±0.19 <sup>a</sup> | 2.13±0.09 <sup>b</sup>   | 1.06±0.07 <sup>c</sup>   | –                        | 1.03±0.05 <sup>c</sup>   | –                        | –                        | –                        | 1.02±0.06 <sup>c</sup>  | 0.96±0.05 <sup>c</sup>   |
| Butanedioic acid diethyl<br>ester      | 9.88±0.43 <sup>a</sup> | 3.27±0.31 <sup>b</sup>   | –                        | –                        | 2.86±0.23 <sup>b</sup>   | –                        | –                        | –                        | –                       | –                        |
| Dimethyl phthalate                     | 2.82±0.15 <sup>d</sup> | 3.15±0.13 <sup>c,d</sup> | 3.24±0.29 <sup>c</sup>   | 3.29±0.14 <sup>c</sup>   | 4.01±0.19 <sup>a,b</sup> | 4.12±0.22 <sup>a</sup>   | 4.05±0.17 <sup>a,b</sup> | 4.14±0.11 <sup>a</sup>   | 3.72±0.19 <sup>b</sup>  | 3.10±0.11 <sup>c,d</sup> |
| Methyl benzoate                        | –                      | 540.2±43.7 <sup>c</sup>  | 618.2±42.5 <sup>c</sup>  | –                        | 953.6±86.4 <sup>b</sup>  | 1268±86 <sup>a</sup>     | 1217±90 <sup>a</sup>     | –                        | –                       | –                        |
| Methyl phenylacetate                   | –                      | 0.87±0.05 <sup>d</sup>   | 0.75±0.03 <sup>e</sup>   | 1.06±0.06 <sup>c</sup>   | 1.20±0.09 <sup>b</sup>   | 1.35±0.11 <sup>a</sup>   | 1.38±0.07 <sup>a</sup>   | 1.19±0.06 <sup>b</sup>   | 1.02±0.05 <sup>c</sup>  | 0.42±0.02 <sup>f</sup>   |
| Isobutyl acetate                       | 6.62±0.39 <sup>a</sup> | 4.39±0.28 <sup>b</sup>   | 4.02±0.25 <sup>c</sup>   | 3.15±0.21 <sup>d</sup>   | 2.54±0.15 <sup>e</sup>   | 2.66±0.14 <sup>e</sup>   | 2.11±0.12 <sup>f</sup>   | 2.32±0.14 <sup>e,f</sup> | 2.05±0.11 <sup>g</sup>  | 1.71±0.10 <sup>g</sup>   |
| Isoamyl acetate                        | 46.3±3.2 <sup>a</sup>  | 32.3±2.1 <sup>b</sup>    | 30.1±2.2 <sup>b,c</sup>  | 28.2±1.2 <sup>c</sup>    | 22.5±1.7 <sup>d</sup>    | 21.2±1.5 <sup>d</sup>    | 20.2±1.3 <sup>d,e</sup>  | 17.8±1.4 <sup>e,f</sup>  | 16.4±1.2 <sup>f</sup>   | 16.9±1.1 <sup>e,f</sup>  |
| Isoamyl lactate                        | –                      | 15.7±0.9 <sup>d</sup>    | 16.3±1.0 <sup>d</sup>    | 16.9±1.1 <sup>d</sup>    | 27.4±1.4 <sup>b</sup>    | 31.8±2.3 <sup>a</sup>    | –                        | 21.2±1.3 <sup>c</sup>    | –                       | –                        |
| Formic acid heptyl ester               | –                      | 0.69±0.05 <sup>d</sup>   | 0.52±0.03 <sup>e</sup>   | 0.85±0.06 <sup>c</sup>   | 1.42±0.08 <sup>b</sup>   | 1.68±0.08 <sup>a</sup>   | 1.62±0.07 <sup>a</sup>   | –                        | –                       | –                        |
| Butyrolactone                          | 2.16±0.13 <sup>a</sup> | 1.42±0.06 <sup>b</sup>   | –                        | –                        | 1.47±0.05 <sup>b</sup>   | 1.43±0.07 <sup>b</sup>   | 1.52±0.07 <sup>b</sup>   | 1.52±0.07 <sup>b</sup>   | 1.56±0.06 <sup>b</sup>  | 1.53±0.06 <sup>b</sup>   |
| <i>Furan(one)s</i>                     |                        |                          |                          |                          |                          |                          |                          |                          |                         |                          |
| Furan                                  | –                      | 0.69±0.03 <sup>d,e</sup> | 0.76±0.04 <sup>c,d</sup> | 0.65±0.03 <sup>e</sup>   | 0.82±0.05 <sup>b,c</sup> | 0.93±0.05 <sup>a</sup>   | 0.95±0.07 <sup>a</sup>   | 0.89±0.07 <sup>a,b</sup> | 0.96±0.07 <sup>a</sup>  | 0.97±0.07 <sup>a</sup>   |
| 1-(2-Furanyl)-ethanone                 | –                      | 2.68±0.16 <sup>f</sup>   | 3.15±0.22 <sup>e</sup>   | 3.16±0.18 <sup>e</sup>   | 4.41±0.28 <sup>d</sup>   | 6.47±0.25 <sup>b,c</sup> | 6.15±0.22 <sup>c</sup>   | 6.90±0.29 <sup>a,b</sup> | 7.04±0.32 <sup>a</sup>  | 7.35±0.39 <sup>a</sup>   |

|                                 |                         |                          |                            |                           |                            |                            |                            |                            |                          |                         |
|---------------------------------|-------------------------|--------------------------|----------------------------|---------------------------|----------------------------|----------------------------|----------------------------|----------------------------|--------------------------|-------------------------|
| 1-(2-Furanyl)-1-propanone       | 13.5±0.6 <sup>a</sup>   | 13.7±0.7 <sup>a</sup>    | 13.7±0.8 <sup>a</sup>      | 14.0±0.7 <sup>a</sup>     | 14.5±0.8 <sup>a</sup>      | 14.5±0.6 <sup>a</sup>      | 14.6±0.6 <sup>a</sup>      | 14.7±0.8 <sup>a</sup>      | 14.7±0.6 <sup>a</sup>    | 14.9±0.8 <sup>a</sup>   |
| 2,2-Dimethyl-5-isopropyl-furan  | 1.02±0.08 <sup>d</sup>  | 1.73±0.12 <sup>c</sup>   | 1.66±0.10 <sup>c</sup>     | 1.79±0.11 <sup>c</sup>    | 2.24±0.08 <sup>b</sup>     | 2.17±0.14 <sup>b</sup>     | 2.27±0.12 <sup>b</sup>     | 2.35±0.11 <sup>b</sup>     | 2.67±0.16 <sup>a</sup>   | 2.70±0.16 <sup>a</sup>  |
| Benzofuran                      | 0.21±0.02 <sup>i</sup>  | 0.72±0.05 <sup>h</sup>   | 0.89±0.06 <sup>g,h</sup>   | 1.01±0.08 <sup>g</sup>    | 1.79±0.11 <sup>f</sup>     | 2.02±0.12 <sup>e</sup>     | 2.25±0.13 <sup>d</sup>     | 2.67±0.13 <sup>b</sup>     | 2.46±0.18 <sup>c</sup>   | 3.53±0.19 <sup>a</sup>  |
| 3-Phenylfuran                   | 8.88±0.43 <sup>d</sup>  | 8.84±0.41 <sup>d</sup>   | 8.91±0.46 <sup>d</sup>     | 9.14±0.45 <sup>d</sup>    | 12.5±0.8 <sup>c</sup>      | 14.7±0.9 <sup>a,b</sup>    | 15.1±1.1 <sup>a,b</sup>    | 14.5±1.0 <sup>b</sup>      | 15.9±1.1 <sup>a,b</sup>  | 16.2±1.2 <sup>a</sup>   |
| 2-Furanmethanol                 | 3609±323 <sup>d</sup>   | 4048±373 <sup>c,d</sup>  | 4220±353 <sup>c,d</sup>    | 4142±328 <sup>c,d</sup>   | 4621±286 <sup>b,c</sup>    | 5148±344 <sup>a,b</sup>    | 5080±292 <sup>a,b</sup>    | 5257±348 <sup>a</sup>      | 5241±351 <sup>a</sup>    | 5460±333 <sup>a</sup>   |
| Dihydro-5-pentyl-2(3H)-furanone | –                       | 2.08±0.11 <sup>f</sup>   | 2.63±0.15 <sup>e</sup>     | 2.72±0.15 <sup>e</sup>    | 4.36±0.24 <sup>d</sup>     | 5.00±0.34 <sup>c</sup>     | 5.72±0.17 <sup>a,b</sup>   | 5.04±0.33 <sup>c</sup>     | 5.38±0.22 <sup>b,c</sup> | 5.95±0.34 <sup>a</sup>  |
| HDMF                            | 1244±84 <sup>e</sup>    | 1577±90 <sup>b,c,d</sup> | 1640±94 <sup>a,b,c</sup>   | 1631±82 <sup>a,b,c</sup>  | 1725±91 <sup>a,b</sup>     | 1772±88 <sup>a</sup>       | 1735±101 <sup>a,b</sup>    | 1677±87 <sup>a,b</sup>     | 1432±105 <sup>d</sup>    | 1497±82 <sup>c,d</sup>  |
| HEMF                            | 1860±92 <sup>d,e</sup>  | 1792±88 <sup>e</sup>     | 1851±90 <sup>d,e</sup>     | 1970±91 <sup>c,d</sup>    | 2109±86 <sup>b,c</sup>     | 2329±91 <sup>a</sup>       | 2188±88 <sup>a,b</sup>     | 1810±91 <sup>d,e</sup>     | 1832±92 <sup>d,e</sup>   | 1891±93 <sup>d,e</sup>  |
| <b>Phenols</b>                  |                         |                          |                            |                           |                            |                            |                            |                            |                          |                         |
| Phenol                          | 11.8±0.7 <sup>b,c</sup> | 8.72±0.57 <sup>e</sup>   | 8.45±0.37 <sup>e</sup>     | 8.27±0.59 <sup>e</sup>    | 10.5±0.6 <sup>d</sup>      | 12.3±0.7 <sup>a,b</sup>    | 13.0±0.6 <sup>a</sup>      | 12.5±0.6 <sup>a,b</sup>    | 12.8±0.6 <sup>a,b</sup>  | 11.2±0.5 <sup>c,d</sup> |
| 4-Ethylphenol                   | 421±31 <sup>a</sup>     | 361±27 <sup>b</sup>      | 340±24 <sup>b</sup>        | 293±16 <sup>c</sup>       | 285±19 <sup>c</sup>        | 228±17 <sup>d</sup>        | 214±16 <sup>d</sup>        | 175±14 <sup>e</sup>        | 155±11 <sup>e</sup>      | 152±13 <sup>e</sup>     |
| 3-Tert-butyl-phenol             | 0.92±0.06 <sup>f</sup>  | 1.13±0.09 <sup>d,e</sup> | 1.21±0.08 <sup>c,d,e</sup> | 1.10±0.08 <sup>e</sup>    | 1.26±0.09 <sup>b,c,d</sup> | 1.32±0.08 <sup>a,b,c</sup> | 1.35±0.07 <sup>a,b,c</sup> | 1.33±0.07 <sup>a,b,c</sup> | 1.39±0.09 <sup>a,b</sup> | 1.42±0.06 <sup>a</sup>  |
| 2,4-Di-tert-butylphenol         | 33.5±2.3 <sup>a</sup>   | 23.5±1.6 <sup>c</sup>    | 24.3±1.7 <sup>b,c</sup>    | 24.7±1.4 <sup>b,c</sup>   | 24.9±1.6 <sup>b,c</sup>    | 15.8±1.6 <sup>d</sup>      | 26.0±2.0 <sup>b,c</sup>    | 26.2±1.9 <sup>b,c</sup>    | 26.3±2.3 <sup>b,c</sup>  | 27.7±2.0 <sup>b</sup>   |
| 4-Ethylguaiaicol                | 3175±149 <sup>a</sup>   | 2870±137 <sup>b</sup>    | 2620±129 <sup>b</sup>      | 2681±132 <sup>b</sup>     | 2290±182 <sup>c</sup>      | 2051±204 <sup>c,d</sup>    | 2120±130 <sup>c</sup>      | 2016±116 <sup>c,d</sup>    | 1782±166 <sup>d</sup>    | 1790±130 <sup>d</sup>   |
| 4-Vinylguaiaicol                | 1181±87 <sup>a</sup>    | 945.3±45.2 <sup>b</sup>  | 913.7±71.2 <sup>b,c</sup>  | 819.3±48.0 <sup>c,d</sup> | 802.5±71.4 <sup>d</sup>    | 747.7±48.2 <sup>d,e</sup>  | 735.3±46.2 <sup>d,e</sup>  | 681.2±43 <sup>e,f</sup>    | 646±49 <sup>e,f</sup>    | 603±34 <sup>f</sup>     |
| 5-Methylguaiaicol               | –                       | 0.83±0.06 <sup>c</sup>   | 0.87±0.04 <sup>c</sup>     | 0.93±0.04 <sup>b,c</sup>  | 0.85±0.04 <sup>c</sup>     | 0.62±0.04 <sup>d</sup>     | 1.02±0.05 <sup>b</sup>     | 1.15±0.07 <sup>a</sup>     | 0.91±0.06 <sup>b,c</sup> | 0.47±0.03 <sup>e</sup>  |
| <b>Pyrazines</b>                |                         |                          |                            |                           |                            |                            |                            |                            |                          |                         |
| Pyrazine                        | –                       | 0.27±0.03 <sup>e</sup>   | 0.32±0.03 <sup>c,d</sup>   | 0.21±0.01 <sup>f</sup>    | 0.34±0.01 <sup>c</sup>     | 0.28±0.02 <sup>d,e</sup>   | 0.36±0.02 <sup>c</sup>     | 0.46±0.02 <sup>b</sup>     | 0.54±0.03 <sup>a</sup>   | 0.54±0.03 <sup>a</sup>  |
| 2-Methyl pyrazine               | –                       | 4.23±0.26 <sup>f</sup>   | 4.37±0.24 <sup>f</sup>     | 6.58±0.44 <sup>e</sup>    | 8.73±0.58 <sup>d</sup>     | 10.6±0.6 <sup>c</sup>      | 11.0±0.5 <sup>c</sup>      | 12.5±0.7 <sup>b</sup>      | 11.3±0.4 <sup>c</sup>    | 13.6±0.8 <sup>a</sup>   |
| 2,3-Dimethyl pyrazine           | –                       | 0.54±0.03 <sup>f</sup>   | 0.67±0.04 <sup>e</sup>     | 0.68±0.04 <sup>e</sup>    | 0.87±0.05 <sup>d</sup>     | 0.97±0.06 <sup>d</sup>     | 1.09±0.05 <sup>c</sup>     | 1.42±0.05 <sup>a</sup>     | 1.34±0.06 <sup>a</sup>   | 1.21±0.05 <sup>b</sup>  |
| 2,5-Dimethyl pyrazine           | 1.32±0.09 <sup>e</sup>  | 1.05±0.06 <sup>f</sup>   | 1.53±0.13 <sup>e</sup>     | 1.46±0.10 <sup>e</sup>    | 2.01±0.11 <sup>d</sup>     | 2.32±0.16 <sup>c</sup>     | 2.41±0.18 <sup>b,c</sup>   | 2.57±0.11 <sup>a,b,c</sup> | 2.63±0.12 <sup>a,b</sup> | 2.82±0.15 <sup>a</sup>  |
| 2,6-Dimethyl pyrazine           | –                       | –                        | –                          | 6.56±0.43 <sup>d</sup>    | 10.5±0.6 <sup>c</sup>      | 12.8±0.6 <sup>b</sup>      | 13.4±0.7 <sup>a,b</sup>    | 14.0±0.8 <sup>a,b</sup>    | 14.4±0.8 <sup>a</sup>    | 14.6±0.6 <sup>a</sup>   |
| 2-Isopropyl pyrazine            | –                       | 0.36±0.03 <sup>f</sup>   | 0.64±0.03 <sup>d,e</sup>   | 0.42±0.03 <sup>f</sup>    | 0.65±0.04 <sup>d</sup>     | 0.94±0.04 <sup>a</sup>     | 0.84±0.03 <sup>b</sup>     | 0.73±0.04 <sup>c</sup>     | 0.57±0.03 <sup>e</sup>   | 0.82±0.06 <sup>b</sup>  |
| Trimethyl pyrazine              | 2.20±0.13 <sup>e</sup>  | 3.75±0.26 <sup>c</sup>   | 3.08±0.19 <sup>d</sup>     | 3.87±0.23 <sup>c</sup>    | 4.51±0.34 <sup>b</sup>     | 5.32±0.34 <sup>a</sup>     | 4.96±0.27 <sup>a,b</sup>   | 5.43±0.44 <sup>a</sup>     | 5.08±0.25 <sup>a,b</sup> | 5.42±0.27 <sup>a</sup>  |
| 2-Ethyl-6-methyl pyrazine       | 2.90±0.19 <sup>f</sup>  | 3.08±0.25 <sup>f</sup>   | 3.67±0.25 <sup>e</sup>     | 3.14±0.24 <sup>f</sup>    | 4.53±0.29 <sup>d</sup>     | 7.53±0.42 <sup>b</sup>     | 7.42±0.35 <sup>b</sup>     | 7.83±0.42 <sup>b</sup>     | 9.75±0.55 <sup>a</sup>   | 6.32±0.24 <sup>c</sup>  |
| 2-Ethyl-3,5-dimethyl            | 0.40±0.02 <sup>b</sup>  | 0.25±0.02 <sup>c,d</sup> | 0.23±0.01 <sup>d</sup>     | 0.18±0.01 <sup>e</sup>    | 0.28±0.01 <sup>c</sup>     | 0.25±0.02 <sup>c,d</sup>   | 0.23±0.01 <sup>d</sup>     | 0.17±0.01 <sup>e</sup>     | 0.48±0.02 <sup>a</sup>   | 0.42±0.02 <sup>b</sup>  |

pyrazine

***Sulfur-containing  
compounds***

|                                    |                          |                         |                          |                          |                          |                          |                            |                            |                          |                          |
|------------------------------------|--------------------------|-------------------------|--------------------------|--------------------------|--------------------------|--------------------------|----------------------------|----------------------------|--------------------------|--------------------------|
| Disulfide dimethyl                 | 1.40±0.09 <sup>e</sup>   | 1.76±0.12 <sup>e</sup>  | 2.94±0.17 <sup>d</sup>   | 3.05±0.20 <sup>d</sup>   | 3.86±0.23 <sup>c</sup>   | 4.75±0.34 <sup>b</sup>   | 4.90±0.25 <sup>b</sup>     | 4.97±0.28 <sup>a,b</sup>   | 5.02±0.34 <sup>a,b</sup> | 5.41±0.36 <sup>a</sup>   |
| Dimethyl trisulfide                | 0.041±0.001 <sup>g</sup> | –                       | 0.072±0.003 <sup>e</sup> | 0.064±0.002 <sup>f</sup> | 0.088±0.004 <sup>d</sup> | 0.108±0.004 <sup>c</sup> | 0.121±0.005 <sup>b</sup>   | 0.133±0.004 <sup>a</sup>   | 0.139±0.007 <sup>a</sup> | 0.141±0.007 <sup>a</sup> |
| 3-Methylthio-1-propanol            | 513.7±42.5 <sup>f</sup>  | 1755±112 <sup>e</sup>   | 1652±105 <sup>e</sup>    | 1635±109 <sup>e</sup>    | 2637±164 <sup>b</sup>    | 3125±185 <sup>a</sup>    | 2936±148 <sup>a</sup>      | 2080±132 <sup>d</sup>      | 2329±153 <sup>c</sup>    | 2226±138 <sup>c,d</sup>  |
| 3-(Methylthio)propanal             | 189±13 <sup>e</sup>      | 219±14 <sup>d</sup>     | 236±15 <sup>b,c,d</sup>  | 228±16 <sup>c,d</sup>    | 259±16 <sup>a,b</sup>    | 277±14 <sup>a</sup>      | 281±15 <sup>a</sup>        | 224±13 <sup>d</sup>        | 254±17 <sup>a,b,c</sup>  | 239±18 <sup>b,c,d</sup>  |
| 2-Hydroxyethyl isobutyl<br>sulfide | 14.7±1.4 <sup>c,d</sup>  | 15.5±1.1 <sup>c</sup>   | 16.3±1.7 <sup>c</sup>    | 16.2±1.1 <sup>c</sup>    | 19.5±1.6 <sup>b</sup>    | 21.8±1.5 <sup>a,b</sup>  | 23.6±1.1 <sup>a</sup>      | 20.5±1.6 <sup>b</sup>      | 13.2±1.1 <sup>d</sup>    | 16.5±1.0 <sup>c</sup>    |
| Ethyl 3-(methylthio)<br>propionate | 16.8±1.1 <sup>a</sup>    | 16.5±1.2 <sup>a</sup>   | 14.1±1.0 <sup>b</sup>    | 10.3±0.7 <sup>c</sup>    | 17.8±1.3 <sup>a</sup>    | 17.6±1.4 <sup>a</sup>    | 17.5±1.3 <sup>a</sup>      | 9.03±0.45 <sup>c</sup>     | 8.75±0.32 <sup>c,d</sup> | 7.20±0.34 <sup>d</sup>   |
| 3-(Methylthio) propyl<br>acetate   | 5.95±0.27 <sup>a</sup>   | 5.91±0.18 <sup>a</sup>  | 4.76±0.24 <sup>b</sup>   | 4.53±0.23 <sup>b</sup>   | 3.71±0.26 <sup>c</sup>   | 2.98±0.13 <sup>d</sup>   | 2.75±0.12 <sup>d,e</sup>   | 2.32±0.11 <sup>f</sup>     | 2.01±0.16 <sup>g</sup>   | 1.92±0.11 <sup>g</sup>   |
| <b><i>Others</i></b>               |                          |                         |                          |                          |                          |                          |                            |                            |                          |                          |
| 2-Acetylpyrroline                  | 0.83±0.05 <sup>e</sup>   | 0.89±0.04 <sup>e</sup>  | 0.90±0.05 <sup>e</sup>   | 0.92±0.05 <sup>d,e</sup> | 1.00±0.05 <sup>d</sup>   | 1.19±0.05 <sup>c</sup>   | 1.14±0.05 <sup>c</sup>     | 1.29±0.06 <sup>b</sup>     | 1.44±0.06 <sup>a</sup>   | 1.40±0.05 <sup>a</sup>   |
| 3-Methyl-2-pyrrolidinone           | 2.57±0.15 <sup>a</sup>   | 2.63±0.17 <sup>a</sup>  | 2.66±0.17 <sup>a</sup>   | 2.67±0.14 <sup>a</sup>   | 2.74±0.21 <sup>a</sup>   | 2.79±0.22 <sup>a</sup>   | 2.79±0.18 <sup>a</sup>     | 2.81±0.22 <sup>a</sup>     | 2.78±0.16 <sup>a</sup>   | 2.79±0.23 <sup>a</sup>   |
| Maltol                             | 13.5±1.1 <sup>c</sup>    | 16.7±1.2 <sup>a,b</sup> | 17.1±1.2 <sup>a,b</sup>  | 17.2±1.2 <sup>a,b</sup>  | 17.8±1.3 <sup>a</sup>    | 18.0±1.4 <sup>a</sup>    | 17.4±1.2 <sup>a</sup>      | 15.1±1.3 <sup>b,c</sup>    | 13.0±1.0 <sup>c</sup>    | –                        |
| Naphthalene                        | 5.08±0.38 <sup>a</sup>   | 5.42±0.36 <sup>a</sup>  | 5.35±0.49 <sup>a</sup>   | 5.61±0.42 <sup>a</sup>   | 5.27±0.38 <sup>a</sup>   | 5.36±0.47 <sup>a</sup>   | 5.18±0.44 <sup>a</sup>     | 4.97±0.37 <sup>a</sup>     | 5.26±0.32 <sup>a</sup>   | 5.41±0.42 <sup>a</sup>   |
| Dodecane                           | 1.47±0.08 <sup>a,b</sup> | 1.53±0.06 <sup>a</sup>  | 1.46±0.07 <sup>a,b</sup> | 1.44±0.07 <sup>a,b</sup> | 1.02±0.07 <sup>e</sup>   | 1.38±0.06 <sup>b,c</sup> | 1.35±0.06 <sup>b,c,d</sup> | 1.36±0.09 <sup>b,c,d</sup> | 1.27±0.07 <sup>c,d</sup> | 1.22±0.09 <sup>d</sup>   |
| Hexadecane                         | 2.48±0.15 <sup>a</sup>   | 2.55±0.18 <sup>a</sup>  | 2.53±0.13 <sup>a</sup>   | 2.58±0.16 <sup>a</sup>   | 2.62±0.17 <sup>a</sup>   | 2.67±0.15 <sup>a</sup>   | 2.58±0.16 <sup>a</sup>     | 2.69±0.15 <sup>a</sup>     | 2.74±0.14 <sup>a</sup>   | 2.49±0.13 <sup>a</sup>   |

\* The unit of compound concentration is mg/L. – not detected in GC-MS. <sup>a–j</sup> Different letters in the same row indicate the significant differences (p < 0.05).
